# Supplementary material for: Theoretical insights into single-pole quadruple-throw (SP4T) inorganic nonlinear optics molecular switch of Na(HCN)3Na: from superalkali to superalkalides
Source: Royal Society of Chemistry journal article supplement (doi:10.1039/d2tc03375e), 2022-01-01
Supplement: d2tc03375e1.pdf [file d2tc03375e1.pdf]

Supporting Information

**Theoretical insights into single-pole quadruple-throw (SP4T)  
inorganic nonlinear optics molecular switch of Na(HCN)<sub>3</sub>Na: from  
superalkali to superalkalides**

Zhi-Jun Wang<sup>a</sup>, Yin-Feng Wang<sup>\*a</sup>, Jia-Mei Zeng<sup>a</sup>, Wen Zhang<sup>a</sup>, Xue-Xia Liu<sup>a</sup>, Jia Li<sup>a</sup>, Zhi-Ru Li<sup>\*b</sup>

---

<sup>a</sup>*Jiangxi Province Key Laboratory of Coordination Chemistry, School of Chemistry and Chemical Engineering, Jinggangshan University, Ji'an, Jiangxi 343009 (P.R. China). E-mail: [cyclont@yeah.net](mailto:cyclont@yeah.net)*

<sup>b</sup>*Institute of Theoretical Chemistry, Jilin University, Changchun 130023 (P.R. China) E-mail: [lzr@jlu.edu.cn](mailto:lzr@jlu.edu.cn)*

## Contents

|                                                                                                                                                                                                                                                                                                                                                                                                                                                                                                                                                                                                                                                                                                                                                                                                                                      |    |
|--------------------------------------------------------------------------------------------------------------------------------------------------------------------------------------------------------------------------------------------------------------------------------------------------------------------------------------------------------------------------------------------------------------------------------------------------------------------------------------------------------------------------------------------------------------------------------------------------------------------------------------------------------------------------------------------------------------------------------------------------------------------------------------------------------------------------------------|----|
| Optimized Cartesian coordinates of $M(\text{HCN})_3M$ ( $M = \text{Li, Na, or K}$ ) at the MP2/6-311+G(d,p) level.....                                                                                                                                                                                                                                                                                                                                                                                                                                                                                                                                                                                                                                                                                                               | S1 |
| <b>Table S1.</b> Convergence of $\beta_{zzz}^{\text{SOS}}$ (and $\beta_0^{\text{SOS}}$ ) as a function of the number of excited states (N) of 2 of $\text{Na}(\text{HCN})_3\text{Na}$ at M06-2X/6-311++G(3df,3pd) level.....                                                                                                                                                                                                                                                                                                                                                                                                                                                                                                                                                                                                         | S4 |
| <b>Table S2.</b> Crucial excited state (CES) and its z-component of transition dipole moment ( $\mu_{0i}^z$ ), variation of z-component of dipole moment between ground state and CES ( $\Delta\mu_z$ , a.u), transition energy ( $\Delta E$ , eV) of CES, oscillator strength ( $f_0$ ), static first hyperpolarizability ( $\beta_0$ , a.u.) and its z-component ( $\beta_{zzz}$ , a.u.) and their values obtained by sum-over-states calculation ( $\beta_0^{\text{SOS}}$ and $\beta_{zzz}^{\text{SOS}}$ , a.u.), contribution of individual CES to $\beta_{zzz}^{\text{SOS}}$ ( $\beta_{zzz}^{\text{C-SOS}}$ , a.u.), and cross term contribution between two CESs ( $\beta_{zzz}^{\text{CT-SOS}}$ ) of 2 of $\text{Na}(\text{HCN})_3\text{Na}$ using different methods with 6-311++G(3df,3pd) basis set.....                    | S5 |
| <b>Table S3.</b> Crucial excited state (CES) and its z-component of transition dipole moment ( $\mu_{0i}^z$ ), variation of z-component of dipole moment between ground state and CES ( $\Delta\mu_z$ , a.u), transition energy ( $\Delta E$ , eV) of CES, oscillator strength ( $f_0$ ) and its z-component ( $f_0^z$ ), static first hyperpolarizability ( $\beta_0$ , a.u.) and its z-component ( $\beta_{zzz}$ , a.u.) and their values obtained by sum-over-states calculation ( $\beta_0^{\text{SOS}}$ and $\beta_{zzz}^{\text{SOS}}$ , a.u.), contribution of individual CES to $\beta_{zzz}^{\text{SOS}}$ ( $\beta_{zzz}^{\text{C-SOS}}$ , a.u.), and cross term contribution between two CESs ( $\beta_{zzz}^{\text{CT-SOS}}$ ) of 2 of $\text{Na}(\text{HCN})_3\text{Na}$ using PBE0 method with different basis sets..... | S6 |
| <b>Table S4.</b> Crucial excited state (CES) and its z-component of transition dipole moment ( $\mu_{0i}^z$ ), variation of z-component of dipole moment between ground state and CES ( $\Delta\mu_z$ , a.u), transition energy ( $\Delta E$ , eV) of CES, oscillator strength ( $f_0$ ), static first hyperpolarizability ( $\beta_0$ , a.u.) and its z-component ( $\beta_{zzz}$ , a.u.) and their values obtained by sum-over-states calculation ( $\beta_0^{\text{SOS}}$ and $\beta_{zzz}^{\text{SOS}}$ , a.u.), contribution of individual CES to $\beta_{zzz}^{\text{SOS}}$ ( $\beta_{zzz}^{\text{C-SOS}}$ , a.u.), and cross term contribution between two CESs ( $\beta_{zzz}^{\text{CT-SOS}}$ ) of 2 of $\text{Na}(\text{HCN})_3\text{Na}$ using CAM-B3LYP method with different basis sets.....                            | S7 |
| <b>Table S5.</b> Crucial excited state (CES) and its z-component of transition dipole moment ( $\mu_{0i}^z$ ), variation of z-component of dipole moment between ground state and CES ( $\Delta\mu_z$ , a.u), transition energy ( $\Delta E$ , eV) of CES, oscillator strength ( $f_0$ ) and its z-component ( $f_0^z$ ), static first hyperpolarizability ( $\beta_0$ , a.u.) and its z-component ( $\beta_{zzz}$ , a.u.) and their values obtained by sum-over-states calculation ( $\beta_0^{\text{SOS}}$ and $\beta_{zzz}^{\text{SOS}}$ , a.u.), contribution of individual CES to $\beta_{zzz}^{\text{SOS}}$ ( $\beta_{zzz}^{\text{C-SOS}}$ , a.u.), and cross term contribution between two CESs ( $\beta_{zzz}^{\text{CT-SOS}}$ ) at PBE0/6-311++G(3df,3pd) level.....                                                        | S8 |
| <b>Fig. S1.</b> HOMOs, ELF and LOL maps of $M(\text{HCN})_3M$ . ( $M = \text{Li or K}$ ) (a) HOMO, (b) ELF, and (b) LOL. HOMOs have the isovalue of 0.02 a.u.....                                                                                                                                                                                                                                                                                                                                                                                                                                                                                                                                                                                                                                                                    | S9 |

Optimized Cartesian coordinates at the MP2/6-311+G(3df,3pd) level.

Na(HCN)<sub>3</sub>Na

**1** *D*<sub>3h</sub>

|    |             |             |             |
|----|-------------|-------------|-------------|
| Na | 0.00000000  | 0.00000000  | 1.96214529  |
| Na | 0.00000000  | -0.00000000 | -1.96214529 |
| C  | -2.74349518 | -1.58395768 | 0.00000000  |
| C  | 0.00000000  | 3.16791537  | 0.00000000  |
| C  | 2.74349518  | -1.58395768 | 0.00000000  |
| N  | 0.00000000  | 2.00184019  | 0.00000000  |
| N  | -1.73364446 | -1.00092010 | 0.00000000  |
| N  | 1.73364446  | -1.00092010 | 0.00000000  |
| H  | 3.66673967  | -2.11699314 | 0.00000000  |
| H  | -3.66673967 | -2.11699314 | -0.00000000 |
| H  | 0.00000000  | 4.23398628  | 0.00000000  |

**2** *C*<sub>3v</sub>

|    |             |             |             |
|----|-------------|-------------|-------------|
| Na | 3.75841187  | -0.00046224 | 0.00026655  |
| Na | -2.33858407 | 0.00009357  | -0.00015826 |
| C  | 0.11564042  | -1.77425474 | -1.41739038 |
| C  | 0.11556798  | -0.34022641 | 2.24512516  |
| C  | 0.11619634  | 2.11503343  | -0.82823149 |
| N  | -1.01038218 | -0.29475051 | 1.94673122  |
| N  | -1.01026570 | -1.53844021 | -1.22872307 |
| N  | -1.00946065 | 1.83306748  | -0.71754141 |
| H  | 1.16959612  | 2.30969747  | -0.90472521 |
| H  | 1.16933812  | -1.93653936 | -1.54723548 |
| H  | 1.16929128  | -0.37155371 | 2.45048264  |

**3** *C*<sub>3v</sub>

|    |             |             |             |
|----|-------------|-------------|-------------|
| C  | 1.30264329  | -0.06014141 | 3.19620303  |
| C  | 1.25252363  | 2.81757172  | -1.55060293 |
| C  | 1.28447454  | -2.73906955 | -1.66540023 |
| N  | 0.93636763  | 1.83631727  | -1.01078224 |
| N  | 0.96642111  | -0.03972004 | 2.08231189  |
| N  | 0.95561661  | -1.78488396 | -1.08609457 |
| H  | 1.57087653  | -3.61665401 | -2.19813392 |
| H  | 1.59585026  | -0.07888542 | 4.22073414  |
| H  | 1.52711475  | 3.71993823  | -2.04690926 |
| Na | -0.47256733 | -0.00358333 | 0.00272174  |
| Na | -3.86748064 | -0.01610360 | 0.01955683  |

**2a** *C*<sub>3v</sub>

|    |             |             |             |
|----|-------------|-------------|-------------|
| Na | -3.64536500 | 0.00128000  | 0.00290200  |
| Na | 2.19400100  | -0.00010500 | -0.00206900 |

|   |             |             |             |
|---|-------------|-------------|-------------|
| C | -0.11120500 | 2.31404600  | -0.14009800 |
| C | -0.10937200 | -1.03624000 | 2.07352500  |
| C | -0.11538800 | -1.27931500 | -1.93442800 |
| N | 1.02669900  | -0.91744500 | 1.83529500  |
| N | 1.02492300  | 2.04856300  | -0.12438700 |
| N | 1.02019600  | -1.13119800 | -1.71092000 |
| H | -1.17692000 | -1.37403700 | -2.07722000 |
| H | -1.17341400 | 2.48184800  | -0.14985600 |
| H | -1.17160100 | -1.11111600 | 2.22400000  |

**3a**  $C_{3v}$

|    |             |             |             |
|----|-------------|-------------|-------------|
| Na | -0.05002200 | 0.03672100  | 3.16767200  |
| Na | -0.00133300 | -0.00316400 | -0.26999200 |
| C  | -3.11172600 | -0.15680100 | -0.39657800 |
| C  | 1.43729900  | 2.75493300  | -0.36144000 |
| C  | 1.70024000  | -2.61655600 | -0.30704700 |
| N  | 1.12552600  | 2.12513800  | -1.29200300 |
| N  | -2.39354700 | -0.12973800 | -1.31479300 |
| N  | 1.32719600  | -2.03204200 | -1.24449200 |
| H  | 2.04374500  | -3.15494900 | 0.54749900  |
| H  | -3.77238500 | -0.18187400 | 0.44065600  |
| H  | 1.72443200  | 3.33473200  | 0.48676200  |

Li(HCN)<sub>3</sub>Li

**2**  $C_{3v}$

|    |             |             |             |
|----|-------------|-------------|-------------|
| C  | 1.11830035  | 1.98330739  | 0.32268934  |
| C  | 1.15888026  | -1.95952177 | 0.32509860  |
| C  | -2.27684654 | -0.02306537 | 0.32439455  |
| N  | 0.89859177  | -1.52108646 | -0.72353079 |
| N  | 0.86740257  | 1.53796028  | -0.72533946 |
| N  | -1.76650445 | -0.01892057 | -0.72399518 |
| H  | -2.75325628 | -0.02705485 | 1.28049215  |
| H  | 1.35238933  | 2.39913033  | 1.27841821  |
| H  | 1.40185185  | -2.36899035 | 1.28134561  |
| Li | -0.00044709 | -0.00098496 | -1.63925616 |
| Li | 0.00064091  | 0.00329186  | 3.48482518  |

**3**  $C_{3v}$

|   |             |             |             |
|---|-------------|-------------|-------------|
| C | -2.67907583 | -1.33400838 | -0.45111695 |
| C | 2.49494593  | -1.65210373 | -0.45238826 |
| C | 0.18348514  | 2.98644873  | -0.45203083 |
| N | 1.55536225  | -1.03031523 | -0.16431055 |
| N | -1.67021601 | -0.83204214 | -0.16361624 |
| N | 0.11429408  | 1.86185979  | -0.16402667 |

|    |             |             |             |
|----|-------------|-------------|-------------|
| H  | 0.24751111  | 4.02568117  | -0.67909821 |
| H  | -3.61124264 | -1.79796360 | -0.67799664 |
| H  | 3.36314080  | -2.22676871 | -0.67967766 |
| Li | 0.00005614  | -0.00042811 | 0.76928565  |
| Li | 0.00273619  | 0.00059960  | 3.76860204  |

K(HCN)<sub>3</sub>K

**2** C<sub>3v</sub>

|   |             |             |             |
|---|-------------|-------------|-------------|
| C | 0.04971604  | -0.91437906 | 2.04831019  |
| C | 0.05026448  | -1.31838968 | -1.81520395 |
| C | 0.04968378  | 2.23257767  | -0.23321805 |
| N | 1.20092868  | -1.20700027 | -1.66161062 |
| N | 1.20039198  | -0.83703527 | 1.87511441  |
| N | 1.20022663  | 2.04318225  | -0.21311292 |
| H | -1.02130584 | 2.33410841  | -0.24409842 |
| H | -1.02140456 | -0.95554554 | 2.14065957  |
| H | -1.02084087 | -1.37773747 | -1.89719439 |
| K | 2.96897145  | 0.00034303  | 0.00002305  |
| K | -4.18188016 | -0.00001177 | -0.00009841 |

Table S1. Convergence of  $\beta_{zz}^{\text{SOS}}$  (and  $\beta_0^{\text{SOS}}$ ) as a function of the number of excited states (N) of **2** of Na(HCN)<sub>3</sub>Na at M06-2X/6-311++G(3df,3pd) level.

| CES     | $\Delta\mu_i^z$ | $\mu_{0i}^z$ | $\Delta E$ | $f_0$  | $\beta_{zz}^{\text{C-SOS}}$ | $\beta_{zz}^{\text{CT-SOS}}$ | $\Sigma\beta_{zz}^{\text{C}}$ | $\beta_{zz}^{\text{SOS}}$ | $\beta_{zz}^e$ | $\beta_0^{\text{SOS}}$ | $\beta_0^e$ |
|---------|-----------------|--------------|------------|--------|-----------------------------|------------------------------|-------------------------------|---------------------------|----------------|------------------------|-------------|
| N = 250 |                 |              |            |        |                             |                              |                               |                           |                |                        |             |
| 4       | -4.1770         | -1.7403      | 1.4563     | 0.1081 | -26501                      |                              |                               |                           |                |                        |             |
| 7       | -4.0964         | -2.3889      | 1.9470     | 0.2725 | -27421                      | 15284                        | -38638                        | -16711                    | -7255          | 3333                   | 10940       |
| N = 200 |                 |              |            |        |                             |                              |                               |                           |                |                        |             |
| 4       | -4.1856         | -1.7366      | 1.4568     | 0.1076 | -26423                      |                              |                               |                           |                |                        |             |
| 7       | -4.1158         | -2.3889      | 1.9467     | 0.2722 | -27535                      | 15193                        | -38766                        | -16922                    | -7255          | 3436                   | 10940       |
| N = 150 |                 |              |            |        |                             |                              |                               |                           |                |                        |             |
| 4       | -4.1856         | -1.7366      | 1.4568     | 0.1076 | -26424                      |                              |                               |                           |                |                        |             |
| 7       | -4.1158         | -2.3889      | 1.9467     | 0.2722 | -27535                      | 15193                        | -38766                        | -16865                    | -7255          | 3429                   | 10940       |
| N = 100 |                 |              |            |        |                             |                              |                               |                           |                |                        |             |
| 4       | -4.1856         | -1.7366      | 1.4568     | 0.1076 | -26424                      |                              |                               |                           |                |                        |             |
| 7       | -4.1158         | -2.3889      | 1.9467     | 0.2722 | -27536                      | 15193                        | -38766                        | -16965                    | -7255          | 3446                   | 10940       |
| N = 50  |                 |              |            |        |                             |                              |                               |                           |                |                        |             |
| 4       | -4.1856         | -1.7366      | 1.4568     | 0.1076 | -26424                      |                              |                               |                           |                |                        |             |
| 7       | -4.1158         | -2.3889      | 1.9467     | 0.2722 | -27535                      | 15193                        | -38766                        | -16110                    | -7255          | 2398                   | 10940       |

Table S2. Crucial excited state (CES) and its z-component of transition dipole moment ( $\mu_{0i}^z$ ), variation of z-component of dipole moment between ground state and CES ( $\Delta\mu_z$ , a.u.), transition energy ( $\Delta E$ , eV) of CES, oscillator strength ( $f_0$ ), static first hyperpolarizability ( $\beta_0$ , a.u.) and its z-component ( $\beta_{zzz}$ , a.u.) and their values obtained by sum-over-states calculation ( $\beta_0^{\text{SOS}}$  and  $\beta_{zzz}^{\text{SOS}}$ , a.u.), contribution of individual CES to  $\beta_{zzz}^{\text{SOS}}$  ( $\beta_{zzz}^{\text{C-SOS}}$ , a.u.), and cross term contribution between two CESs ( $\beta_{zzz}^{\text{CT-SOS}}$ ) of **2** of Na(HCN)<sub>3</sub>Na using different methods with 6-311++G(3df,3pd) basis set.

| CES       | $\Delta\mu_z$ | $\mu_{0i}^z$ | $\Delta E$ | $f_0$  | $\beta_{zzz}^{\text{C-SOS}}$ | $\beta_{zzz}^{\text{CT-SOS}}$ | $\beta_{zzz}^{\text{SOS}}$ | $\beta_{zzz}^c$ | $\beta_0^{\text{SOS}}$ | $\beta_0^c$ |
|-----------|---------------|--------------|------------|--------|------------------------------|-------------------------------|----------------------------|-----------------|------------------------|-------------|
| M06-2X    |               |              |            |        |                              |                               |                            |                 |                        |             |
| 4         | -4.1856       | 1.7366       | 1.4568     | 0.1076 | -26424                       |                               |                            |                 |                        |             |
| 7         | -4.1158       | -2.3889      | 1.9467     | 0.2722 | -27536                       | 15193                         | -16965                     | -7255           | 3446                   | 10940       |
| PBE0      |               |              |            |        |                              |                               |                            |                 |                        |             |
| 4         | -3.5984       | -2.2777      | 1.4845     | 0.1887 | -37635                       |                               |                            |                 |                        |             |
| 10        | 1.3287        | -2.4242      | 2.2094     | 0.3181 | 7106                         | 22804                         | -9608                      | -7255           | 8578                   | 10940       |
| B3LYP     |               |              |            |        |                              |                               |                            |                 |                        |             |
| 4         | -3.4252       | 2.2120       | 1.4174     | 0.1699 | -37059                       |                               |                            |                 |                        |             |
| 10        | -1.3309       | -2.1953      | 2.1681     | 0.2560 | -6062                        | 15813                         | -28665                     | -7255           | 13634                  | 10940       |
| CAM-B3LYP |               |              |            |        |                              |                               |                            |                 |                        |             |
| 4         | -4.2242       | 2.0870       | 1.5313     | 0.1634 | -34859                       |                               |                            |                 |                        |             |
| 8         | -1.1707       | -2.3835      | 2.1989     | 0.3060 | -6111                        | 18081                         | -9539                      | -7255           | 6195                   | 10940       |
| LC-BLYP   |               |              |            |        |                              |                               |                            |                 |                        |             |
| 4         | -4.9230       | 1.9908       | 1.7744     | 0.1723 | -27532                       |                               |                            |                 |                        |             |
| 7         | -0.3365       | 2.4981       | 2.2706     | 0.3472 | -1809                        | 25236                         | -2685                      | -7255           | 16678                  | 10940       |
| WB97X-D   |               |              |            |        |                              |                               |                            |                 |                        |             |
| 3         | 3.2341        | -2.5192      | 1.6550     | 0.2573 | 33291                        |                               |                            |                 |                        |             |
| 7         | -1.9103       | -2.3386      | 2.2907     | 0.3069 | -8845                        | -26979                        | -2775                      | -7255           | 21006                  | 10940       |

Table S3. Crucial excited state (CES) and its z-component of transition dipole moment ( $\mu_{0i}^z$ ), variation of z-component of dipole moment between ground state and CES ( $\Delta\mu_z$ , a.u), transition energy ( $\Delta E$ , eV) of CES, oscillator strength ( $f_0$ ) and its z-component ( $f_0^z$ ), static first hyperpolarizability ( $\beta_0$ , a.u.) and its z-component ( $\beta_{zzz}$ , a.u.) and their values obtained by sum-over-states calculation ( $\beta_0^{\text{SOS}}$  and  $\beta_{zzz}^{\text{SOS}}$ , a.u.), contribution of individual CES to  $\beta_{zzz}^{\text{SOS}}$  ( $\beta_{zzz}^{\text{C-SOS}}$ , a.u.), and cross term contribution between two CESs ( $\beta_{zzz}^{\text{CT-SOS}}$ ) of **2** of Na(HCN)<sub>3</sub>Na using PBE0 method with different basis sets.

| CES               | $\Delta\mu_z$ | $\mu_{0i}^z$ | $\Delta E$ | $f_0$  | $\beta_{zzz}^{\text{C-SOS}}$ | $\beta_{zzz}^{\text{CT-SOS}}$ | $\beta_{zzz}^{\text{SOS}}$ | $\beta_{zzz}^c$ | $\beta_0^{\text{SOS}}$ | $\beta_0^c$ |
|-------------------|---------------|--------------|------------|--------|------------------------------|-------------------------------|----------------------------|-----------------|------------------------|-------------|
| 6-311++G(3df,3pd) |               |              |            |        |                              |                               |                            |                 |                        |             |
| 4                 | -3.5984       | -2.2777      | 1.4845     | 0.1887 | -37635                       |                               |                            |                 |                        |             |
| 10                | 1.3287        | -2.4242      | 2.2094     | 0.3181 | 7106                         | 22804                         | -9608                      | -7255           | 8578                   | 10940       |
| 6-311++G(2d,2p)   |               |              |            |        |                              |                               |                            |                 |                        |             |
| 4                 | -3.6172       | 2.2880       | 1.4845     | 0.1904 | -38173                       |                               |                            |                 |                        |             |
| 10                | 1.0358        | -2.4003      | 2.2120     | 0.3124 | 5419                         | 10045                         | -12018                     | -7255           | 6521                   | 10940       |
| aug-cc-pVTZ       |               |              |            |        |                              |                               |                            |                 |                        |             |
| 4                 | -3.5936       | -2.2765      | 1.4857     | 0.1886 | -37484                       |                               |                            |                 |                        |             |
| 10                | 0.8719        | -2.3965      | 2.2105     | 0.3110 | 4552                         | 21685                         | -11046                     | -7255           | 6215                   | 10940       |
| aug-pc-2          |               |              |            |        |                              |                               |                            |                 |                        |             |
| 4                 | -3.5925       | 2.2858       | 1.4857     | 0.1902 | -37779                       |                               |                            |                 |                        |             |
| 10                | 0.2223        | -2.4096      | 2.2239     | 0.3164 | 1159                         | 21897                         | -12244                     | -7255           | 5337                   | 10940       |
| ma-TZVP           |               |              |            |        |                              |                               |                            |                 |                        |             |
| 4                 | -3.6821       | -2.2837      | 1.4844     | 0.1896 | -38718                       |                               |                            |                 |                        |             |
| 10                | 0.5802        | -2.3959      | 2.2075     | 0.3105 | 3036                         | 22781                         | -11939                     | -7255           | 6554                   | 10940       |
| POL               |               |              |            |        |                              |                               |                            |                 |                        |             |
| 4                 | -3.6148       | -2.2865      | 1.4813     | 0.1897 | -38265                       |                               |                            |                 |                        |             |
| 10                | 1.3682        | -2.3870      | 2.2043     | 0.3077 | 7128                         | 22641                         | 10997                      | -7255           | 6926                   | 10940       |



Table S4. Crucial excited state (CES) and its z-component of transition dipole moment ( $\mu_{0i}^z$ ), variation of z-component of dipole moment between ground state and CES ( $\Delta\mu_z$ , a.u), transition energy ( $\Delta E$ , eV) of CES, oscillator strength ( $f_0$ ), static first hyperpolarizability ( $\beta_0$ , a.u.) and its z-component ( $\beta_{zzz}$ , a.u.) and their values obtained by sum-over-states calculation ( $\beta_0^{\text{SOS}}$  and  $\beta_{zzz}^{\text{SOS}}$ , a.u.), contribution of individual CES to  $\beta_{zzz}^{\text{SOS}}$  ( $\beta_{zzz}^{\text{C-SOS}}$ , a.u.), and cross term contribution between two CESs ( $\beta_{zzz}^{\text{CT-SOS}}$ ) of **2** of Na(HCN)<sub>3</sub>Na using CAM-B3LYP method with different basis sets.

| CES               | $\Delta\mu_z$ | $\mu_{0i}^z$ | $\Delta E$ | $f_0$  | $\beta_{zzz}^{\text{C-SOS}}$ | $\beta_{zzz}^{\text{CT-SOS}}$ | $\beta_{zzz}^{\text{SOS}}$ | $\beta_{zzz}^c$ | $\beta_0^{\text{SOS}}$ | $\beta_0^c$ |
|-------------------|---------------|--------------|------------|--------|------------------------------|-------------------------------|----------------------------|-----------------|------------------------|-------------|
| 6-311++G(3df,3pd) |               |              |            |        |                              |                               |                            |                 |                        |             |
| 4                 | -4.2242       | 2.0870       | 1.5313     | 0.1634 | -34859                       |                               |                            |                 |                        |             |
| 8                 | -1.1707       | -2.3835      | 2.1989     | 0.3060 | -6111                        | 18081                         | -9539                      | -7255           | 6195                   | 10940       |
| 6-311++G(2d,2p)   |               |              |            |        |                              |                               |                            |                 |                        |             |
| 4                 | -4.2100       | 2.1006       | 1.5346     | 0.1659 | -35046                       |                               |                            |                 |                        |             |
| 8                 | -1.2229       | -2.3731      | 2.1995     | 0.3035 | -6324                        | 17853                         | -11184                     | -7255           | 4691                   | 10940       |
| aug-cc-pVTZ       |               |              |            |        |                              |                               |                            |                 |                        |             |
| 4                 | -4.1900       | 2.0908       | 1.5292     | 0.1638 | -34799                       |                               |                            |                 |                        |             |
| 8                 | -1.4944       | -2.3635      | 2.1927     | 0.3001 | -7713                        | 17389                         | -10197                     | -7255           | 4988                   | 10940       |
| aug-pc-2          |               |              |            |        |                              |                               |                            |                 |                        |             |
| 4                 | -4.2125       | 2.0926       | 1.5301     | 0.1642 | -35006                       |                               |                            |                 |                        |             |
| 8                 | -1.8960       | -2.3693      | 2.2052     | 0.3033 | -9723                        | 17616                         | -10681                     | -7255           | 4131                   | 10940       |
| ma-TZVP           |               |              |            |        |                              |                               |                            |                 |                        |             |
| 4                 | -4.2907       | 2.1019       | 1.5371     | 0.1664 | -35646                       |                               |                            |                 |                        |             |
| 8                 | -1.6309       | -2.3686      | 2.1955     | 0.3018 | -8433                        | 18340                         | -11133                     | -7255           | 4562                   | 10940       |
| POL               |               |              |            |        |                              |                               |                            |                 |                        |             |
| 4                 | -4.2502       | 2.1048       | 1.5277     | 0.1658 | -35843                       |                               |                            |                 |                        |             |
| 8                 | -0.9268       | 2.3639       | 2.1975     | 0.3008 | -4764                        | 18813                         | -10586                     | -7255           | 4987                   | 10940       |

Table S5. Crucial excited state (CES) and its z-component of transition dipole moment ( $\mu_{0i}^z$ ), variation of z-component of dipole moment between ground state and CES ( $\Delta\mu_z$ , a.u), transition energy ( $\Delta E$ , eV) of CES, oscillator strength ( $f_0$ ) and its z-component ( $f_0^z$ ), static first hyperpolarizability ( $\beta_0$ , a.u.) and its z-component ( $\beta_{zz}$ , a.u.) and their values obtained by sum-over-states calculation ( $\beta_0^{\text{SOS}}$  and  $\beta_{zz}^{\text{SOS}}$ , a.u.), contribution of individual CES to  $\beta_{zz}^{\text{SOS}}$  ( $\beta_{zz}^{\text{C-SOS}}$ , a.u.), and cross term contribution between two CESs ( $\beta_{zz}^{\text{CT-SOS}}$ ) at PBE0/6-311++G(3df,3pd). level

| CES                     | $\Delta\mu_z$ | $\mu_{0i}^z$ | $\Delta E$ | $f_0$  | $f_0^z$ | $\beta_{zz}^{\text{C-SOS}}$ | $\beta_{zz}^{\text{CT-SOS}}$ | $\beta_{zz}^{\text{SOS}}$ | $\beta_{zz}$ | $\beta_0^{\text{SOS}}$ | $\beta_0$ |
|-------------------------|---------------|--------------|------------|--------|---------|-----------------------------|------------------------------|---------------------------|--------------|------------------------|-----------|
| Na(HCN) <sub>3</sub> Na |               |              |            |        |         |                             |                              |                           |              |                        |           |
|                         | 11            | 0.0000       | -2.5101    | 1.6439 | 0.2538  | 0.2538                      | 0.00                         |                           |              |                        |           |
| <b>1</b>                | 19            | 0.0000       | -1.4876    | 2.1523 | 0.1167  | 0.1167                      | 0.00                         | 0.00                      | 0.00         | 188                    | 417       |
|                         | 13,14         | 0.000        | 0.000      | 1.7267 | 0.3178  | 0.0000                      | 0.00                         |                           |              |                        |           |
|                         | 4             | -5.2780      | -1.8715    | 1.5523 | 0.1332  | 0.1332                      | -34082                       |                           |              |                        |           |
| <b>2a</b>               | 10            | 1.6686       | 2.3587     | 2.2709 | 0.3096  | 0.3096                      | 7997                         | 20271                     | -9925        | -6633                  | 6113      |
|                         | 8,9           | -2.6386      | 0.0035     | 2.2146 | 0.3231  | 0.0000                      | -0.32                        |                           |              |                        |           |
|                         | 4             | -3.5984      | -2.2777    | 1.4845 | 0.1887  | 0.1887                      | -37635                       |                           |              |                        |           |
|                         | 10            | 1.3287       | -2.4242    | 2.2094 | 0.3181  | 0.3181                      | 7106                         | 22804                     |              |                        |           |
| <b>2</b>                | 8,9           | 4.8301       | 0.0007     | 2.1836 | 0.2387  | 0.0000                      | 0.01                         |                           | -9608        | -7255                  | 8578      |
|                         | 11,12         | 6.9324       | 0.0024     | 2.3660 | 0.1328  | 0.0000                      | 0.04                         |                           |              |                        |           |
|                         | 9             | 1.7820       | 2.8250     | 2.1734 | 0.4251  | 0.4249                      | 13375                        |                           |              |                        |           |
| <b>3a</b>               | 7,8           | -0.2509      | 0.0584     | 2.0999 | 0.2691  | 0.0002                      | -0.88                        |                           | 15206        | 9488                   | 16804     |
|                         | 10            | 2.7266       | 2.6999     | 2.0139 | 0.3597  | 0.3597                      | 21771                        |                           |              |                        |           |
| <b>3</b>                | 8,9           | -7.0148      | -0.0050    | 1.7021 | 0.1100  | 0.0000                      | -0.46                        |                           | 39459        | 5785                   | 50104     |
|                         | 11,12         | -1.0820      | 0.0022     | 2.0676 | 0.2888  | 0.0000                      | -0.06                        |                           |              |                        |           |
| Li(HCN) <sub>3</sub> Li |               |              |            |        |         |                             |                              |                           |              |                        |           |
|                         | 3             | 3.2262       | -2.6624    | 1.5842 | 0.2751  | 0.2751                      | 40482                        |                           |              |                        |           |
| <b>2</b>                | 10            | -2.6205      | -1.9288    | 2.3733 | 0.2163  | 0.2163                      | -7689                        | -38233                    | -5396        | -6818                  | 7703      |
|                         | 8,9           | 2.8684       | 0.0007     | 2.2813 | 0.2964  | 0.0000                      | 0.00                         |                           |              |                        |           |
|                         | 7             | 8.9446       | -1.5799    | 1.6349 | 0.1000  | 0.1000                      | 37110                        |                           |              |                        |           |
|                         | 10            | -3.7399      | -1.9820    | 2.1076 | 0.2029  | 0.2028                      | -14694                       | -27678                    |              |                        |           |
| <b>3</b>                | 8,9           | 5.6566       | 0.0019     | 1.7521 | 0.1119  | 0.0000                      | 0.03                         |                           | 28264        | 2845                   | 39105     |
|                         | 11,12         | -0.0426      | 0.0131     | 2.1238 | 0.2316  | 0.0000                      | -0.00                        |                           |              |                        |           |
| K(HCN) <sub>3</sub> K   |               |              |            |        |         |                             |                              |                           |              |                        |           |
|                         | 4             | 4.4207       | 2.1395     | 1.1650 | 0.1306  | 0.1306                      | 66237                        |                           |              |                        |           |
|                         | 10            | -4.3533      | 3.0808     | 1.7092 | 0.3975  | 0.3975                      | -62837                       | -33902                    |              |                        |           |
| <b>2</b>                | 5,6           | -1.9802      | -0.0012    | 1.4299 | 0.1140  | 0.0000                      | -0.01                        |                           | -54413       | -24437                 | 14709     |
|                         | 11,12         | -4.4579      | 0.0115     | 1.9430 | 0.1947  | 0.0000                      | -0.83                        |                           |              |                        |           |

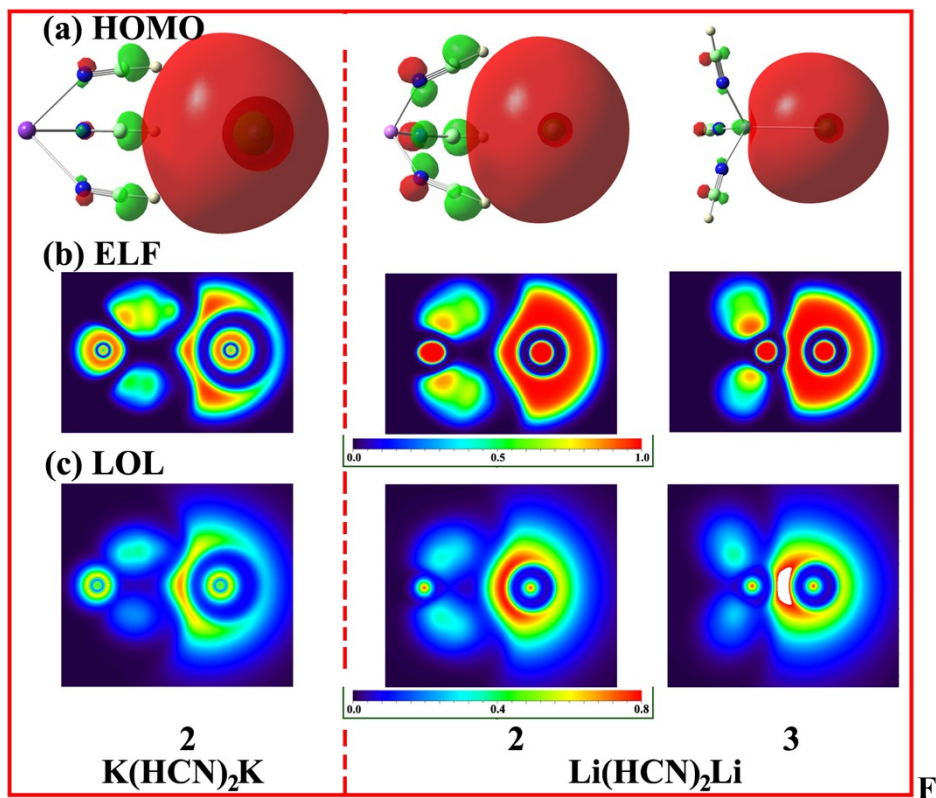

**Fig. S1.** HOMOs, ELF and LOL maps of  $\text{M}(\text{HCN})_3\text{M}$ . (M = Li or K) (a) HOMO, (b) ELF, and (b) LOL. HOMOs have the isovalue of 0.02 a.u.
